# Supplementary material
Source: PubMed Central journal article supplement (PMC4721247)
Supplement: NIHMS746539-supplement-SI.pdf [file NIHMS746539-supplement-SI.pdf]

## Supporting Information

### **Domain cooperativity in multidomain proteins: what can we learn from molecular alignment in anisotropic media?**

Tairan Yuwen<sup>\*</sup>, Carol Beth Post<sup>\*\*</sup>, and Nikolai Skrynnikov<sup>\*†</sup>

<sup>\*</sup> Department of Chemistry and <sup>\*\*</sup> Department of Medicinal Chemistry and Molecular Pharmacology, Purdue University, West Lafayette IN 47907, USA

<sup>†</sup> Corresponding author ([nikolai@purdue.edu](mailto:nikolai@purdue.edu))

| Construct             | Forward primer                                                                                                                                              | Reverse primer                                                                                                                              | Full amino-acid sequence                                                                                                                                                     |
|-----------------------|-------------------------------------------------------------------------------------------------------------------------------------------------------------|---------------------------------------------------------------------------------------------------------------------------------------------|------------------------------------------------------------------------------------------------------------------------------------------------------------------------------|
| dSH3                  | CATG <b>CCATGG</b> AGCTTGT<br>GCTAGCACTCTATG                                                                                                                | ATCGATAAGCTT <b>GGATCC</b> TAC                                                                                                              | MELVLALYDYEKSPREVTMKKGDILTLLNST<br>NKDWWKVEVNDRQGFVPAAYVKKLD                                                                                                                 |
| fSH3                  | —                                                                                                                                                           | —                                                                                                                                           | <b>MDE</b> TGKELVLALYDYEKSPREVTMKKGDILT<br>LLNSTNKDWWKVEVNDRQGFVPAAYVKKLD                                                                                                    |
| dSH3- <i>sl</i> -dSH3 | N domain:<br>CATG <b>CCATGG</b> AGCTTGT<br>GCTAGCACTCTATG<br><br>C domain:<br>ACG <b>CTCCGGA</b> GAGCTTG<br>TGCTAGCACTCTATG                                 | N domain:<br>ACG <b>CTCCGGA</b> ACCATCTAGTTT<br>TTTCACATAGGCAGC<br><br>C domain:<br>ATCGATAAGCTT <b>GGATCC</b> TAC                          | MELVLALYDYEKSPREVTMKKGDILTLLNST<br>NKDWWKVEVNDRQGFVPAAYVKKLD <b>DSG</b> GEL<br>VLALYDYEKSPREVTMKKGDILTLLNSTNKD<br>WWKVEVNDRQGFVPAAYVKKLD                                     |
| dSH3- <i>ml</i> -dSH3 | N domain:<br>CATG <b>CCATGG</b> AGCTTGT<br>GCTAGCACTCTATG<br><br>C domain:<br>ACG <b>CTCCGGA</b> GGTGGTG<br>GTGAGCTTGTGCTAGCA<br>CTCTATG                    | N domain:<br>ACG <b>CTCCGGA</b> ACCACCACCAC<br>CATCTAGTTTTTTCACATAGGC<br>AGC<br><br>C domain:<br>ATCGATAAGCTT <b>GGATCC</b> TAC             | MELVLALYDYEKSPREVTMKKGDILTLLNST<br>NKDWWKVEVNDRQGFVPAAYVKKLD <b>DGGGG</b><br><b>SGGGG</b> ELVLALYDYEKSPREVTMKKGDILT<br>LNSTNKDWWKVEVNDRQGFVPAAYVKKLD                         |
| dSH3- <i>ll</i> -dSH3 | N domain:<br>CATG <b>CCATGG</b> AGCTTGT<br>GCTAGCACTCTATG<br><br>C domain:<br>ACG <b>CTCCGGA</b> GGCGGA<br>GGCTCAGGTGGTGGTG<br>GTTCTGGAGGTGGTGGT<br>GAGCTTG | N domain:<br>ACG <b>CTCCGGA</b> CCCGCCTCCGC<br>CTGAACCACCACCACCGGAAC<br>CACCACCACCATCTAG<br><br>C domain:<br>ATCGATAAGCTT <b>GGATCC</b> TAC | MELVLALYDYEKSPREVTMKKGDILTLLNST<br>NKDWWKVEVNDRQGFVPAAYVKKLD <b>DGGGG</b><br><b>SGGGGSGGGGSGGGGSGGGGSGGGG</b> ELVL<br>ALYDYEKSPREVTMKKGDILTLLNSTNKD<br>WKVEVNDRQGFVPAAYVKKLD |

Tab. S1. DNA primer sequences used in production of  $\alpha$ -spectrin SH3 constructs and amino-acid sequences of the constructs. DNA restriction sites are marked in red, disordered residues marked in blue. fSH3 plasmid [Musacchio *et al. Nature* **1992**, 359, 851] was used as a PCR template to construct dSH3. In turn, dSH3 plasmid was used as a template for dSH3-*sl*-dSH3 and dSH3-*ml*-dSH3 and, finally, dSH3-*ml*-dSH3 was used as a template for dSH3-*ll*-dSH3.

| Residue | dSH3  | dSH3  | fSH3  | fSH3 (high salt) | dSH3-s/-dSH3 | dSH3-s/-dSH3 | dSH3-m/-dSH3 | dSH3-l/-dSH3 | dSH3-l/-dSH3 |
|---------|-------|-------|-------|------------------|--------------|--------------|--------------|--------------|--------------|
| 9       | w     | -32.4 | -9.4  | -20.0            | 12.5         | 12.0         | 2.8          | -0.2         | -0.5         |
| 10      | w     | w     | -16.0 | w                | 15.4         | 14.6         | 7.8          | -0.5         | -1.3         |
| 11      | 4.6   | 5.1   | 2.5   | 5.5              | 15.8         | 12.5         | 7.0          | 8.5          | 9.7          |
| 12      | 0.5   | 2.5   | 0.2   | w                | w            | w            | w            | -2.8         | -4.1         |
| 13      | w     | s     | -2.3  | 0.0              | 9.9          | 9.3          | 6.7          | 5.7          | 6.5          |
| 14      | -11.9 | -18.0 | -0.5  | 5.2              | 15.0         | 14.8         | 9.5          | 7.7          | 8.9          |
| 15      | w     | w     | 11.7  | 17.8             | 15.1         | 14.9         | 9.8          | 11.9         | 13.9         |
| 16      | 14.6  | 11.8  | 10.4  | 16.8             | 22.9         | 22.1         | 10.8         | 13.3         | 15.4         |
| 17      | w     | 34.2  | 12.5  | 21.9             | 1.1          | 1.3          | 1.5          | 8.3          | 8.9          |
| 18      | w     | w     | -25.0 | w                | 4.3          | 4.0          | -1.1         | -10.0        | -11.8        |
| 19      | w     | w     | 19.7  | 32.4             | -23.0        | -22.4        | -9.9         | -4.0         | -5.1         |
| 20      | p     | p     | p     | p                | p            | p            | p            | p            | p            |
| 21      | 32.4  | w     | 15.3  | 24.8             | 4.5          | 4.8          | 4.9          | 7.3          | 8.9          |
| 22      | -4.6  | -2.0  | -10.7 | -20.4            | -13.0        | -13.2        | -6.8         | -11.6        | -13.0        |
| 23      | w     | w     | -7.2  | -7.0             | 16.3         | 16.1         | 6.3          | 3.0          | 2.6          |
| 24      | -6.6  | -16.2 | 1.9   | 2.8              | 19.3         | 18.6         | 10.1         | 9.8          | 11.1         |
| 25      | 25.1  | 33.4  | 14.1  | w                | 14.1         | 13.7         | 8.4          | 11.1         | 12.7         |
| 26      | 25.1  | 24.3  | 8.8   | w                | 13.3         | 12.4         | 9.1          | 5.8          | 6.5          |
| 27      | 5.7   | 6.7   | -5.6  | -10.3            | 4.0          | 3.1          | 1.9          | -2.1         | -3.4         |
| 28      | w     | w     | -14.7 | w                | 2.3          | 3.4          | -0.7         | -3.0         | -3.0         |
| 29      | 36.7  | o     | 17.0  | 25.9             | -15.9        | -15.4        | o            | 1.3          | 2.0          |
| 30      | -19.9 | -22.8 | -9.2  | w                | o            | o            | o            | 3.0          | 3.2          |
| 31      | -16.3 | -23.5 | -5.6  | -11.9            | 16.7         | 16.1         | 7.4          | 7.1          | 4.8          |
| 32      | -26.3 | -22.2 | -9.4  | -21.2            | -2.7         | -3.5         | -3.9         | -5.4         | -6.2         |
| 33      | w     | w     | 13.5  | w                | -26.1        | -26.5        | w            | -2.0         | -2.0         |
| 34      | 19.7  | 17.9  | -6.1  | w                | 4.3          | 7.0          | 3.0          | -0.6         | -1.5         |
| 35      | w     | w     | -21.8 | w                | 10.1         | 9.8          | 0.6          | -2.3         | -2.9         |
| 36      | -15.0 | -20.0 | -14.1 | -23.4            | 10.1         | 9.6          | 2.7          | -2.1         | -3.6         |
| 37      | -11.7 | -20.0 | 0.2   | -2.6             | 18.4         | 17.5         | 9.3          | 6.9          | 8.4          |
| 38      | -14.2 | -14.5 | -7.9  | -13.7            | 9.5          | 9.2          | 4.0          | 2.7          | 2.9          |
| 39      | 8.1   | o     | 3.2   | o                | -17.2        | -15.6        | o            | -2.8         | -2.7         |
| 40      | 5.4   | 4.8   | o     | o                | -12.4        | -12.1        | -5.3         | -0.4         | -0.1         |
| 41      | -35.2 | w     | -20.2 | w                | -0.2         | 0.1          | -2.8         | -6.7         | -7.7         |
| 42      | w     | w     | -23.7 | w                | 7.4          | 7.5          | 3.0          | -4.1         | -4.8         |
| 43      | w     | w     | o     | w                | 5.2          | 5.4          | -1.3         | -10.3        | -13.1        |
| 44      | 8.0   | w     | -1.2  | -4.5             | -13.6        | -13.0        | -9.8         | -9.9         | -11.6        |
| 45      | o     | o     | 6.6   | o                | o            | o            | o            | o            | o            |
| 46      | s     | s     | o     | w                | -26.9        | -26.1        | -13.3        | -8.5         | -9.6         |
| 47      | 28.7  | 31.8  | 12.2  | 21.2             | -21.6        | -21.5        | -11.3        | -0.7         | -1.9         |
| 48      | -12.1 | -10.8 | -9.6  | -17.5            | -5.7         | -5.8         | -5.9         | -7.7         | -8.7         |
| 49      | 9.2   | 8.1   | 12.9  | 24.9             | o            | o            | o            | -0.6         | -2.1         |
| 50      | 8.4   | 8.3   | 10.0  | 16.6             | o            | o            | o            | o            | o            |
| 51      | 17.8  | 26.4  | 9.0   | 13.2             | -23.9        | -23.1        | -11.9        | -6.3         | -6.5         |
| 52      | 26.4  | 30.0  | 10.2  | 17.6             | -22.7        | -22.6        | -9.7         | -6.8         | -8.7         |
| 53      | -34.5 | -36.4 | -27.4 | w                | 4.8          | 4.7          | -0.4         | -9.4         | -11.9        |
| 54      | p     | p     | p     | p                | p            | p            | p            | p            | p            |
| 55      | w     | w     | 15.5  | w                | -27.4        | -25.7        | -11.1        | -4.9         | -6.3         |
| 56      | 40.9  | w     | 23.4  | 41.5             | -29.7        | -29.7        | -11.6        | -4.7         | -6.4         |
| 57      | w     | w     | 12.7  | w                | -8.0         | -8.5         | -3.1         | 2.6          | 3.3          |
| 58      | s     | s     | -8.8  | -13.9            | -2.9         | -2.1         | -3.7         | -2.1         | -2.4         |
| 59      | o     | o     | -11.8 | o                | o            | o            | o            | o            | o            |
| 60      | 0.1   | -0.2  | -0.3  | -1.3             | 12.1         | 11.9         | 5.3          | 6.3          | 6.8          |

Tab. S2. Experimentally measured RDCs in various constructs of  $\alpha$ -spc SH3 domain. For tandems, each value represents the average between the N- and C-terminal sites. Sample conditions are pH 3.5, 20 mM sodium citrate, 5% PEG/hexanol ( $r=0.85$ ); high salt sample additionally contains 100 mM NaCl. Abbreviations: (w) weak peak, (o) overlapped peak, (p) proline residue, (s) misshaped peak.

| Residue | dSH3  | fSH3  | dSH3- <i>sl</i> -dSH3 | dSH3- <i>ml</i> -dSH3 | dSH3- <i>ll</i> -dSH3 |
|---------|-------|-------|-----------------------|-----------------------|-----------------------|
| 9       | -22.3 | -5.2  | 12.6                  | 4.2                   | -0.6                  |
| 10      | -27.9 | -8.4  | 14.4                  | 11.1                  | -0.8                  |
| 11      | -0.5  | 1.4   | 12.5                  | 7.7                   | 5.5                   |
| 12      | 2.2   | 0.1   | w                     | w                     | -2.1                  |
| 13      | -16.4 | -0.8  | 9.4                   | 6.0                   | 3.7                   |
| 14      | -12.1 | 0.3   | 14.4                  | 9.7                   | 5.0                   |
| 15      | 15.9  | 7.0   | 14.3                  | 10.7                  | 7.5                   |
| 16      | 8.9   | 6.2   | 22.1                  | 12.9                  | 8.4                   |
| 17      | 24.5  | 7.0   | 1.4                   | 2.3                   | 5.8                   |
| 18      | w     | -14.7 | 4.8                   | -1.0                  | -7.4                  |
| 19      | 43.4  | 10.1  | -22.7                 | -12.0                 | -1.7                  |
| 20      | p     | p     | p                     | p                     | p                     |
| 21      | 30.0  | 8.4   | 4.1                   | 5.7                   | 5.1                   |
| 22      | -1.7  | -6.3  | -12.7                 | -6.6                  | -7.7                  |
| 23      | -19.0 | -4.5  | 15.8                  | 7.2                   | 1.4                   |
| 24      | -8.5  | 0.4   | 17.9                  | 10.5                  | 5.7                   |
| 25      | 25.9  | 7.7   | 13.2                  | 10.4                  | 6.9                   |
| 26      | 17.9  | 5.4   | 11.0                  | 8.5                   | 4.0                   |
| 27      | 4.9   | -2.9  | 3.3                   | 1.5                   | -2.1                  |
| 28      | -19.5 | -8.5  | 3.9                   | -0.1                  | -1.9                  |
| 29      | 39.3  | 9.0   | -15.1                 | o                     | 0.7                   |
| 30      | -17.7 | -5.1  | o                     | o                     | 1.6                   |
| 31      | -19.9 | -3.2  | 14.4                  | 8.3                   | 4.5                   |
| 32      | -16.0 | -5.5  | -3.3                  | -4.2                  | -4.8                  |
| 33      | 35.7  | 6.5   | -26.5                 | -10.2                 | -1.1                  |
| 34      | 2.9   | -3.9  | w                     | 2.6                   | -0.2                  |
| 35      | -30.2 | -11.8 | 9.3                   | 3.4                   | -1.5                  |
| 36      | -11.5 | -7.8  | 8.6                   | 2.3                   | -2.3                  |
| 37      | -21.4 | 0.5   | 17.8                  | 8.8                   | 4.6                   |
| 38      | -11.4 | -3.9  | 9.3                   | 3.5                   | 1.5                   |
| 39      | 9.0   | 1.5   | -16.6                 | o                     | -0.7                  |
| 40      | 4.1   | o     | -11.0                 | -4.0                  | 0.5                   |
| 41      | -28.0 | -11.0 | -0.4                  | -3.1                  | -4.5                  |
| 42      | w     | -13.0 | 7.5                   | 1.7                   | -3.1                  |
| 43      | w     | -16.6 | 5.2                   | -1.6                  | -7.5                  |
| 44      | 16.9  | -1.1  | -13.4                 | -7.9                  | -6.9                  |
| 45      | o     | 2.9   | o                     | o                     | o                     |
| 46      | 20.1  | 8.4   | -27.3                 | -15.8                 | -5.1                  |
| 47      | 22.9  | 6.1   | -19.7                 | -11.1                 | -2.7                  |
| 48      | -8.3  | -6.2  | -6.4                  | -6.1                  | -4.4                  |
| 49      | 6.5   | 6.9   | o                     | o                     | -0.1                  |
| 50      | 6.0   | 5.2   | o                     | o                     | o                     |
| 51      | 20.6  | 4.2   | -23.1                 | -12.4                 | -3.7                  |
| 52      | 21.5  | 5.2   | -20.1                 | -9.3                  | -4.3                  |
| 53      | -26.6 | -14.8 | 4.3                   | -1.3                  | -6.7                  |
| 54      | p     | p     | p                     | p                     | p                     |
| 55      | 30.1  | 7.8   | -26.9                 | -19.1                 | -1.4                  |
| 56      | 46.4  | 12.6  | -29.3                 | -15.2                 | -2.0                  |
| 57      | 7.6   | 6.8   | -8.3                  | -2.5                  | 2.4                   |
| 58      | -8.8  | -5.0  | -2.3                  | -3.6                  | -1.6                  |
| 59      | o     | -6.3  | o                     | o                     | o                     |
| 60      | -0.2  | 0.2   | 11.8                  | 6.5                   | 3.6                   |

Tab. S2. Experimentally measured RDCs in various constructs of  $\alpha$ -spc SH3 domain. For tandems, each value represents the average between the N- and C-terminal sites. Sample conditions are pH 3.5, 20 mM sodium citrate, 5% PEG/hexanol ( $r=0.96$ ).

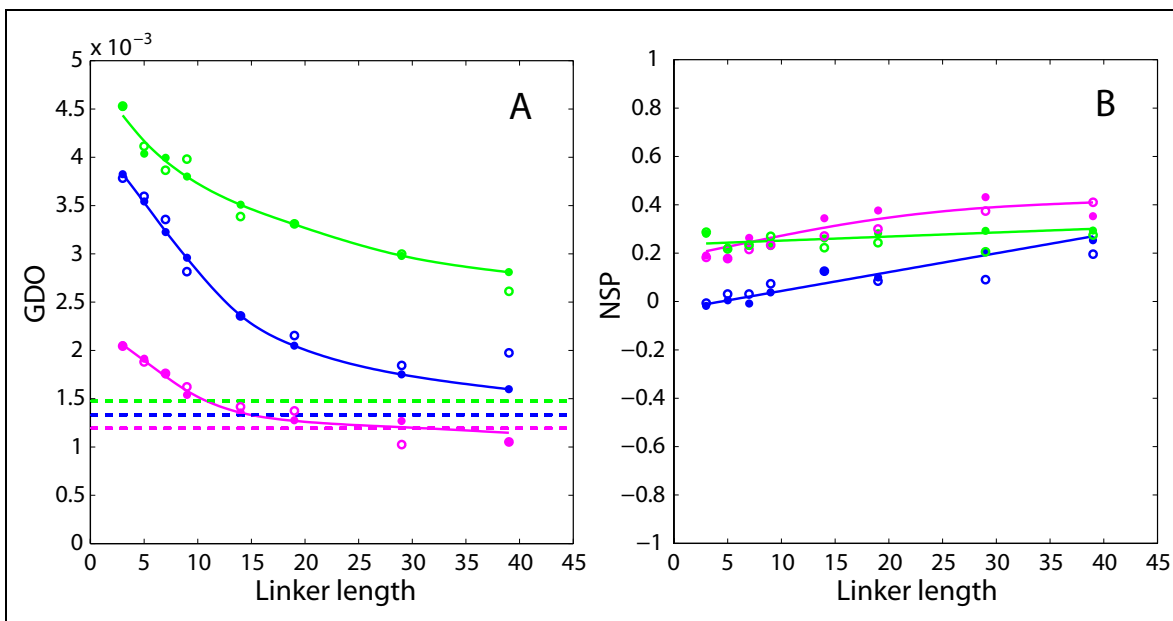

Fig. S1. PALES simulations of steric alignment in a series of computer-generated tandem proteins. The plot reproduces the results from Fig. 3 (closed circles) and, in addition, contains the results from the equivalent series of simulations using independently generated structural ensembles (open circles).
